# Supplementary material for: Restoration of lysosomal acidification rescues autophagy and metabolic dysfunction in non-alcoholic fatty liver disease
Source: Springer Nature journal article supplement (doi:10.1038/s41467-023-38165-6), 2023-05-04
Supplement: MOESM1 [file 41467_2023_38165_MOESM1_ESM.pdf]

## **Supplementary Information**

### **Restoration of Lysosomal Acidification Rescues Autophagy and Metabolic Dysfunction in Non-alcoholic Fatty Liver Disease**

Jialiu Zeng<sup>1,2\*</sup>, Rebeca Acin-Perez<sup>3,†</sup>, Essam A. Assali<sup>3,†</sup>, Andrew Martin<sup>1</sup>, Alexandra J. Brownstein<sup>3</sup>, Anton Petcherski<sup>3</sup>, Lucía Fernández del Río<sup>3</sup>, Ruiqing Xiao<sup>4,5</sup>, Chih Hung Lo<sup>2</sup>, Michaël Shum<sup>3,6</sup>, Marc Liesa<sup>3,6,7,8</sup>, Xue Han<sup>1</sup>, Orian S. Shirihai<sup>3,6,9,\*</sup> and Mark W. Grinstaff<sup>1,4,9,\*</sup>

<sup>1</sup>Department of Biomedical Engineering, Boston University, Boston, MA 02215.

<sup>2</sup>Lee Kong Chian School of Medicine, Nanyang Technological University, Singapore, Singapore 308232.

<sup>3</sup>Division of Endocrinology, Department of Medicine, David Geffen School of Medicine, University of California, Los Angeles, Los Angeles, CA 90045.

<sup>4</sup>Department of Chemistry, Boston University, Boston, MA 02215.

<sup>5</sup>Shenzhen Middle School, Shenzhen, Guangdong 518001, China

<sup>6</sup>Molecular and Medical Pharmacology, David Geffen School of Medicine at University of California, Los Angeles, Los Angeles, CA 90045.

<sup>7</sup>Molecular Biology Institute at University of California, Los Angeles, Los Angeles, CA 90095.

<sup>8</sup>Institut de Biologia Molecular de Barcelona, IBMB, CSIC, Baldiri Reixac 4-8, Barcelona, Catalonia, 08028, Spain.

<sup>9</sup>Department of Medicine, Boston University School of Medicine, Boston, MA 02118.

\*To whom correspondence should be addressed: [jialiu.zeng@ntu.edu.sg](mailto:jialiu.zeng@ntu.edu.sg); [OShirihai@mednet.ucla.edu](mailto:OShirihai@mednet.ucla.edu); [mgrin@bu.edu](mailto:mgrin@bu.edu).

**† Equal contributions**

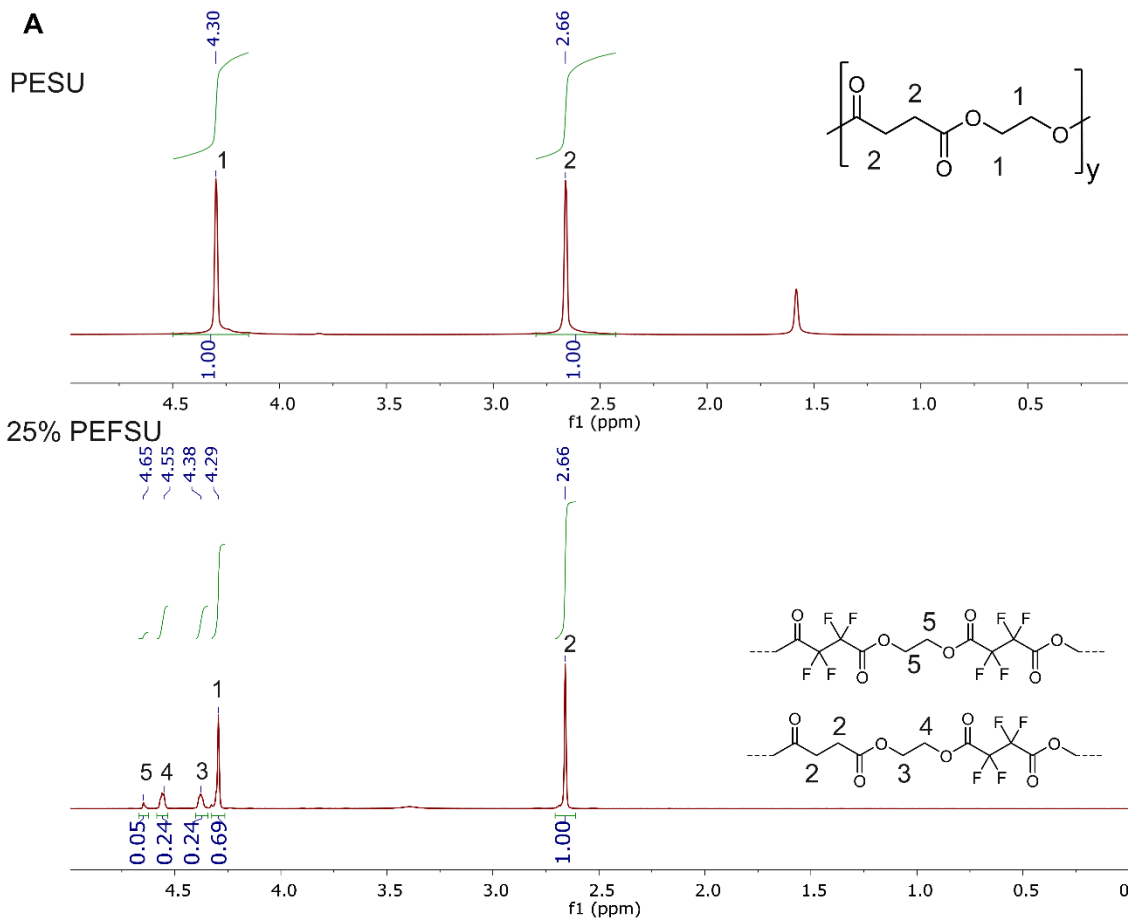

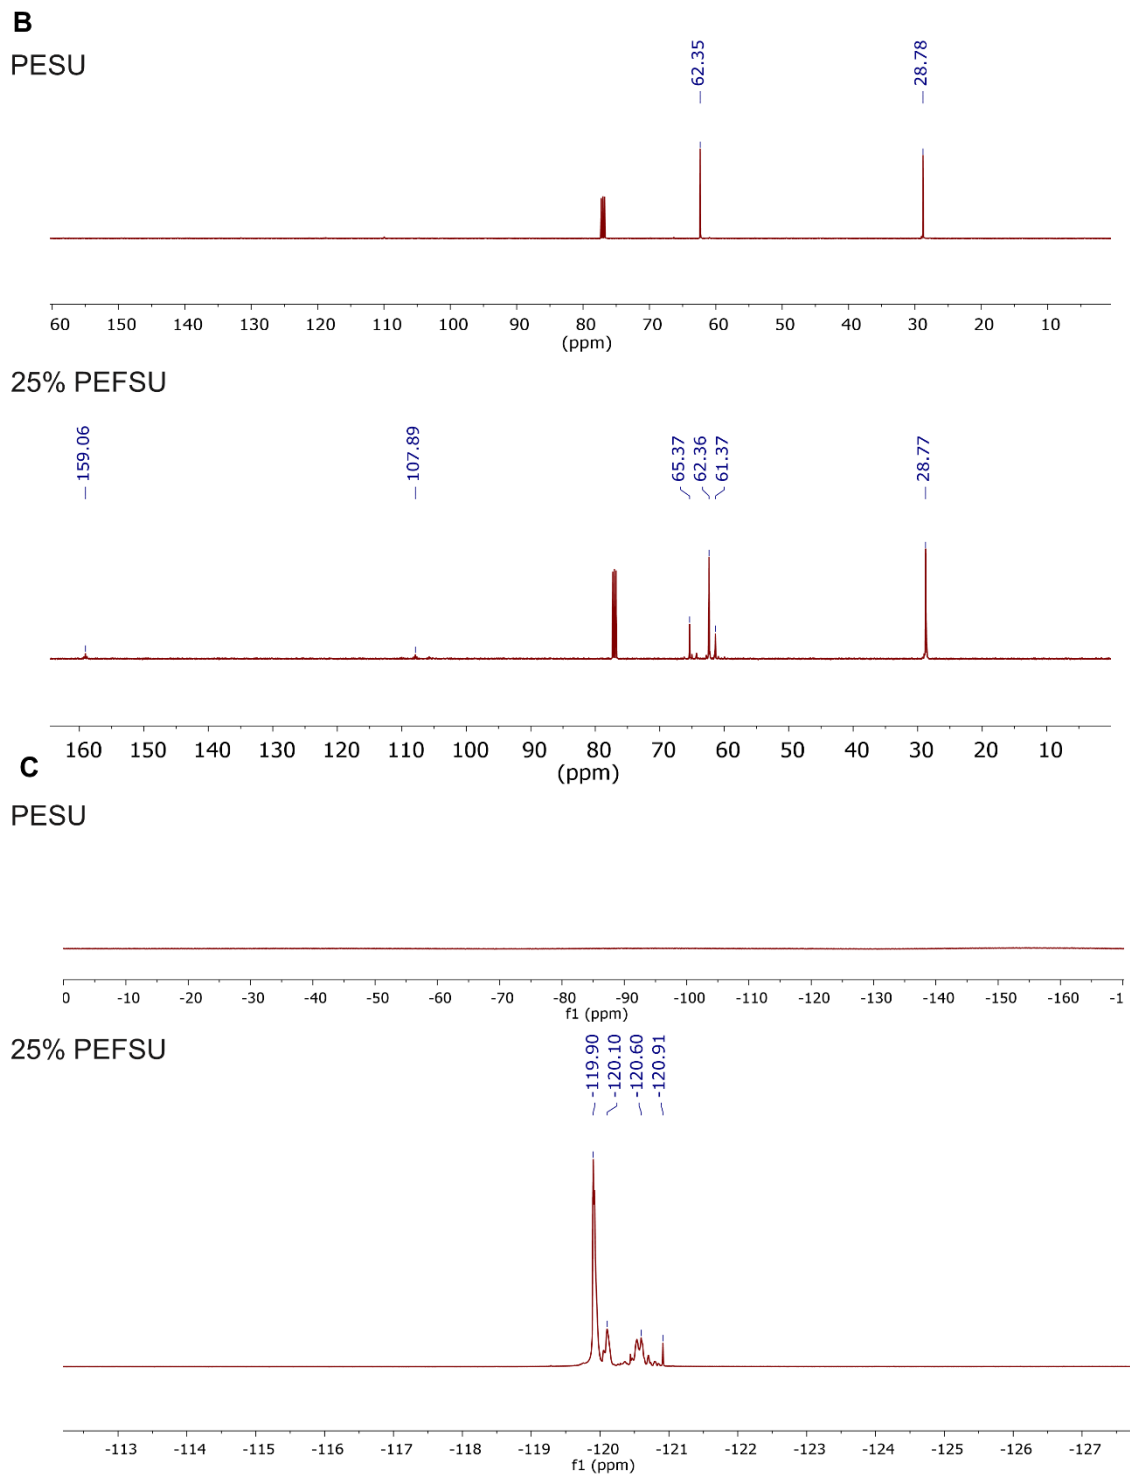

### Supplementary Figure. 1.

Material characterizations for PESU and 25% PEFSU polymer. (A)  $^1\text{H}$  NMR spectra of PESU and 25% PEFSU.  $^1\text{H}$  NMR [(500 MHz,  $\text{CDCl}_3$ ): PESU  $\delta$  4.30 (s, 1H), 2.66 (s, 1H)], [25% PEFSU  $\delta$  2.66 (s, 1H), 4.29 (s, 0.69H), 4.38 (s, 0.24H), 4.55 (s, 0.24H), 4.65 (s, 0.05H)]. (B)  $^{13}\text{C}$  NMR spectra of PESU and 25% PEFSU.  $^{13}\text{C}$  NMR [(500 MHz,  $\text{CDCl}_3$ ): PESU, 62.35, 28.78], [25%

PEFSU 159.06, 107.89, 62.36, 61.37, 28.77]. (C)  $^{19}\text{F}$  NMR spectra of 25% PEFSU.  $^{19}\text{F}$  NMR [(500 MHz,  $\text{CDCl}_3$ ): 25 % PEFSU -120.91, -120.60, -120.10, -119.90].

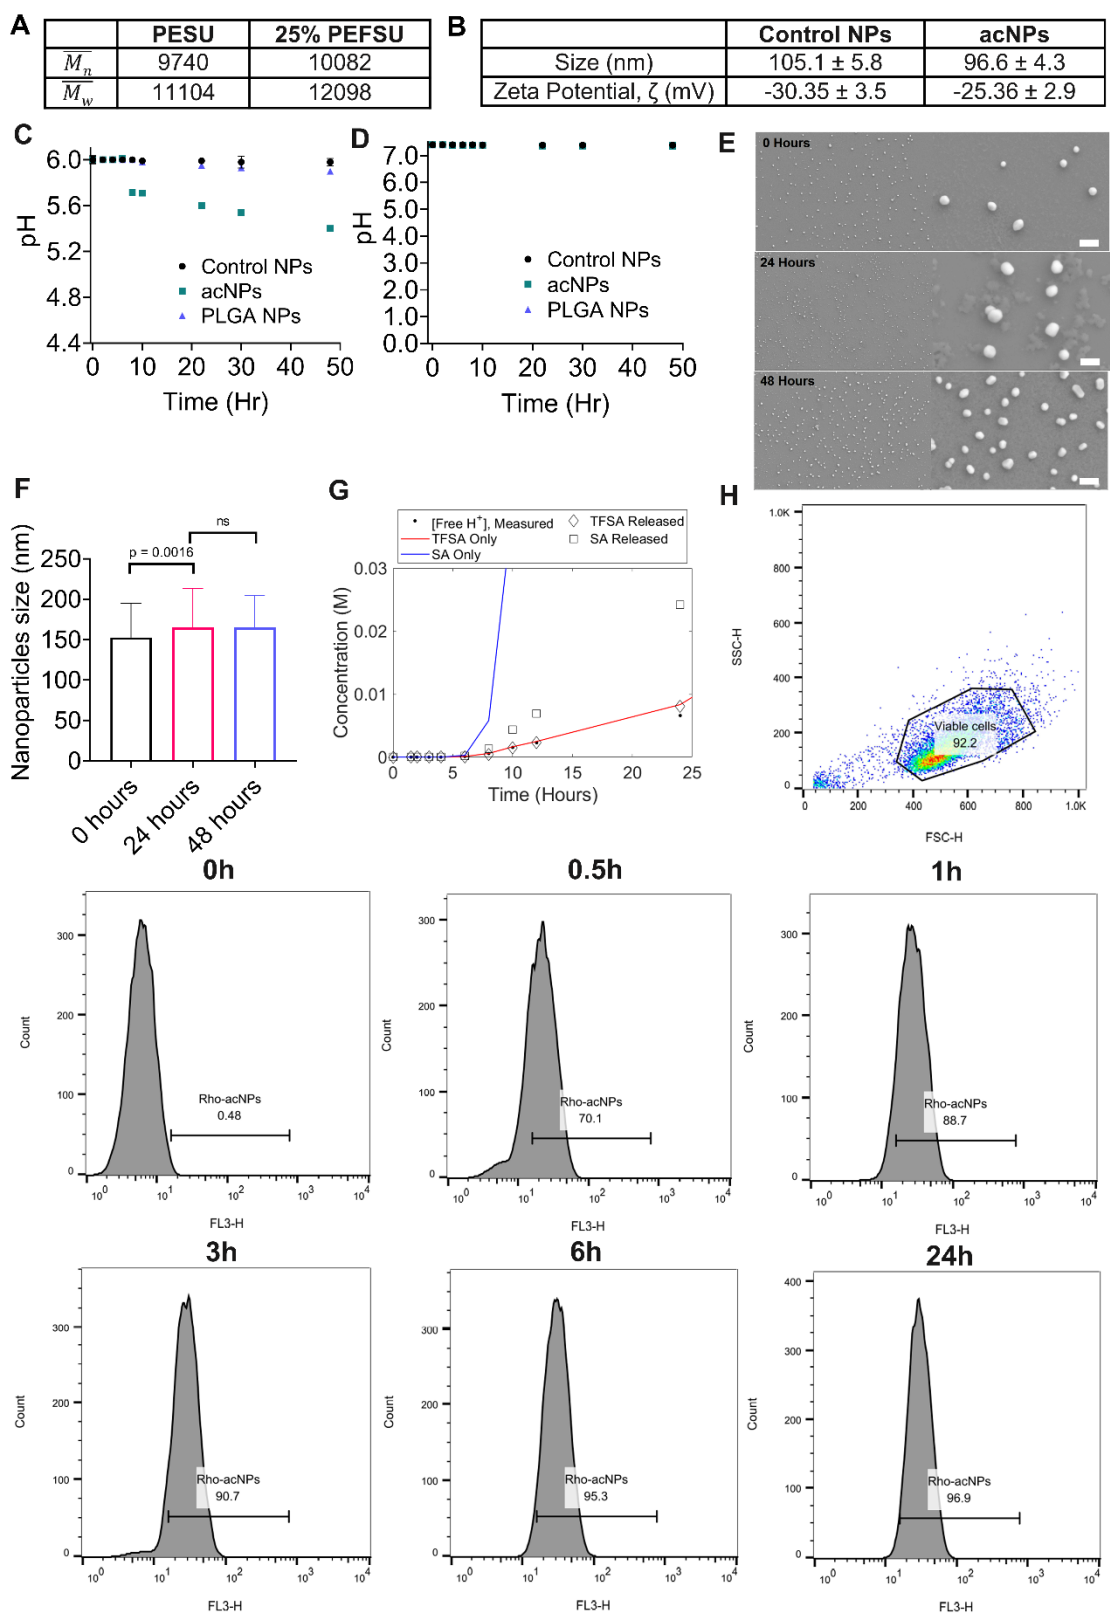

## Supplementary Figure. 2.

(A) Molecular weights of PESU and 25% PEFSU polymer. (B) Size and zeta potential of control NPs and acNPs determined using dynamic light scattering (DLS) and zeta potentializer. (C) Degradation curve of control NPs, acNPs and PLGA NPs in 20 mM pH 6.0 (N = 3 independent experiments) and (D) pH 7.4 buffered solution. PLGA NPs did not significantly acidify either pH 6.0 or pH 7.4 buffer compared to acNPs (N = 3 independent experiments). (E) SEM micrographs of acidic NPs (25% PEFSU polymer) degradation over 48 hours. (F) Quantification of nanoparticle sizes using ImageJ (n=200 nanoparticles analyzed per condition). (G) We used the measured free acid in solution (based on pH measured in DI water) (black filled dots) to calculate the amount of TFSA (black diamonds) and SA (black squares) in solution to produce these pH changes assuming released acid follows the known polymer composition of 25% TFSA, 75% SA (generated from 25% PEFSU degradation). We then generated theoretical bounds for TFSA and SA combinations in solution by calculating the amount of TFSA only (red line) or SA only (blue line) to also yield these pH changes from their respective homopolymers. A large concentration of SA only is needed to generate significant changes in pH (PESU polymer), while it requires relatively little TFSA (< 0.005 M) release from 25% PEFSU to induce these changes. The equations used for these calculations is in Supplementary Note. (H) Representative images of gating strategy used for flow cytometry analysis of Rho-acNPs uptake in cells. FL3-H indicates the red fluorescence channel on 620 FACscan. Two-tailed unpaired t test (F); data are expressed as means  $\pm$  SD. n.s. not statistically significant. Source data are provided as a Source Data file.

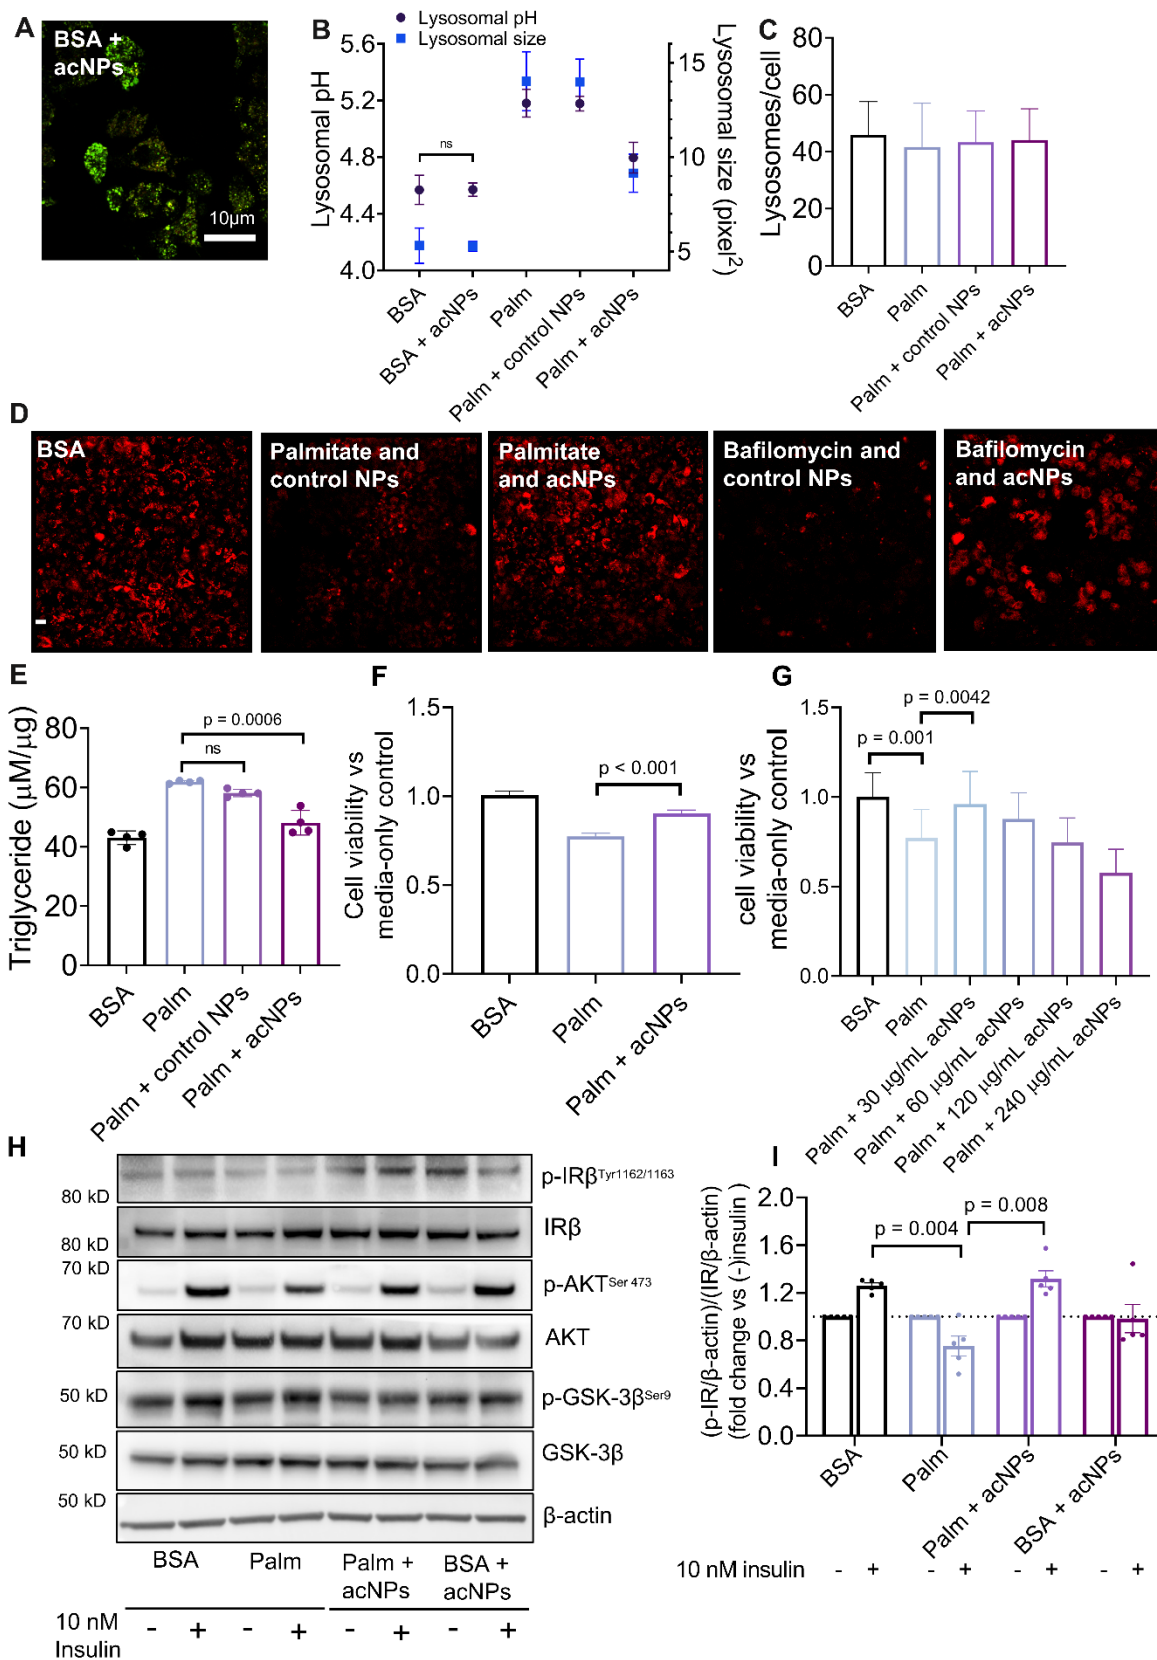

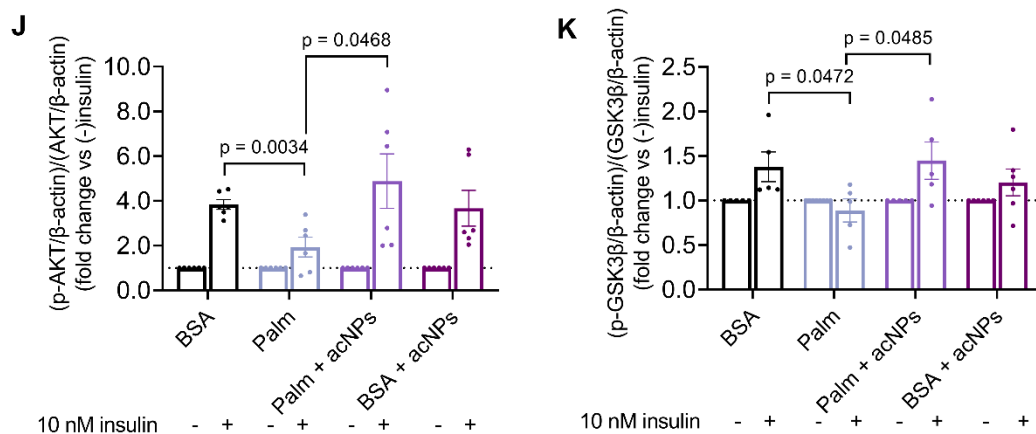

### Supplementary Figure. 3.

acNPs function on lysosomal number, cathepsin L activity and autophagic flux in HepG2 cells. (A) Lysosensor yellow/blue imaging of BSA treated with acNPs. (B) Quantification of BSA and acNPs treated lysosomal pH and size (N=3 independent experiments with n=20 cells per condition). (C) Lysosome number per cell quantified from different treatment conditions (N=3 independent experiments with n=20 cells per condition). (D) Magic red imaging of lysosomes with different conditions, puncta indicate lysosomes. Palmitate treatment reduces lysosomal cathepsin L enzyme activity, hence reducing overall fluorescence. Addition of acNPs increases fluorescent puncta indicating restoration of lysosome cathepsin L activity. When bafilomycin, a lysosome V-ATPase inhibitor is added, lysosomal cathepsin L activity is reduced due to reduced lysosomal acidity. Treatment with acNPs acidifies lysosomes and restore lysosomal cathepsin L activity. Bar = 20 μm. (E) HepG2 cells triglyceride levels under different treatment conditions (N=4 independent experiments). (F) Cell viability of HepG2 cells (N=3 independent experiments, n=20 cells per condition), and (G) Primary human hepatocytes under palmitate conditions, and palmitate treated with nanoparticles (N=3 independent experiments). (H – K) Representative western blot exposure images showing protein expression data for insulin signaling pathway proteins. IR: Insulin receptor β (4B8); p-IR: phosphor-insulin receptor (Tyr 1162 and 1163); AKT: protein kinase B; p-AKT: phospho-protein kinase B (Ser 473); GSK3β: glycogen synthase kinase-3 beta; p-GSK3β: phospho-glycogen synthase kinase-3 beta (Ser 9). All results are expressed as a fold increase in the insulin-stimulated state relative to the unstimulated state (Palm = Palmitate, N=5 independent experiments). Two-tailed unpaired t test (B, E, F, G, I, J, K); data are expressed as means ± SD. n.s. not statistically significant. Source data are provided as a Source Data file.

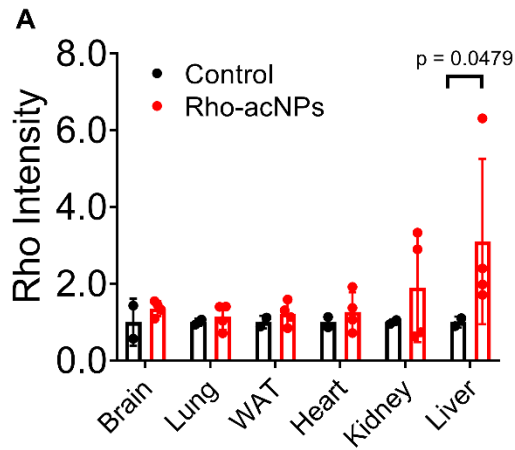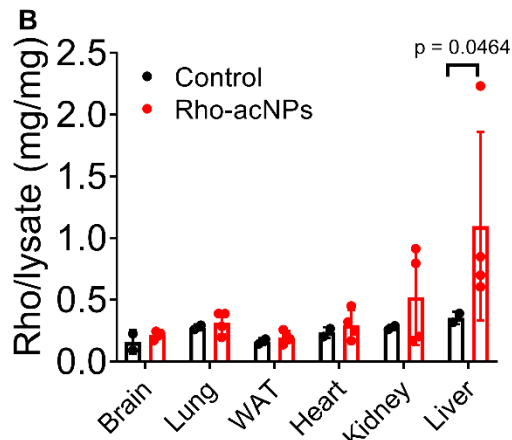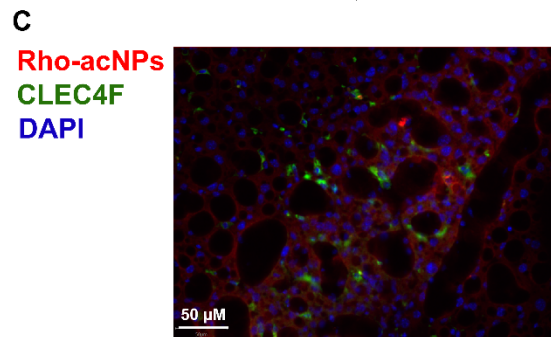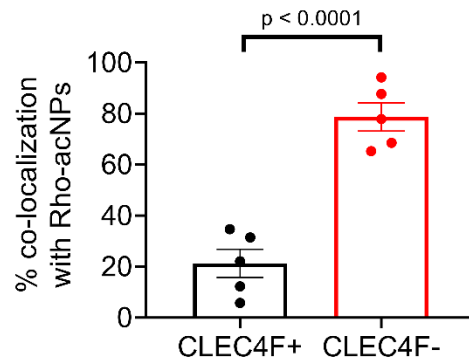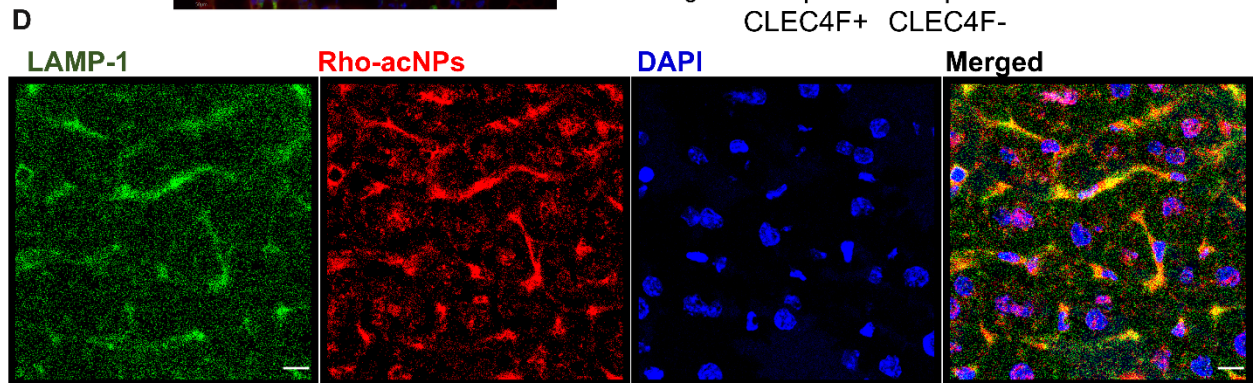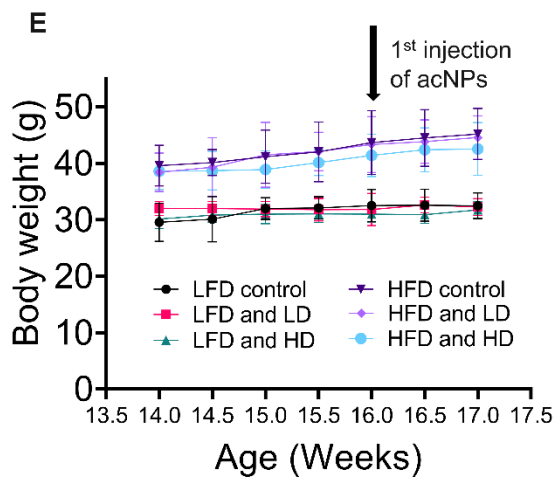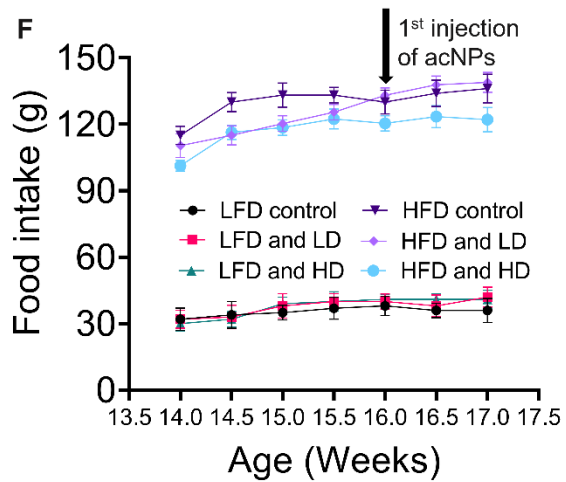

#### **Supplementary Figure. 4.**

acNPs biodistribution and safety in mice. (A – B) Biodistribution of Rho-acNPs injection in mice. acNPs show significant accumulation in liver tissues (n=2 animals for control group, n=4 animals for Rho-acNPs group). (C) Representative confocal images showing that Rho-acNPs colocalize mainly in hepatocytes and not Kupffer cells, which are stained with anti-CLEC4F (n=5 animals for treatment group). Bar = 50  $\mu$ m. (D) Rho-acNPs co-localize in the lysosomes of liver hepatocytes (n= 3 animals per condition). Bar = 10  $\mu$ m.. (E) Body weight change and (F) food intake for mice across the treatment period. The acNPs treatment did not result in significant weight loss or decrease in food intake. Two-tailed unpaired t test (A, B, C); data are expressed as means  $\pm$  SD. Source data are provided as a Source Data file.

| Single injection of acNPs |      |             |             |             |                  |
|---------------------------|------|-------------|-------------|-------------|------------------|
| Parameter                 |      | HFD Control | HFD and LD  | HFD and HD  | Reference values |
| WBC                       | K/uL | 9.64 ± 2.4  | 9.33 ± 1.4  | 11.6 ± 2.3  | 1.8 - 10.7       |
| NE                        | K/uL | 2.40 ± 1.1  | 2.74 ± 0.5  | 2.63 ± 0.45 | 0.1 - 2.4        |
| LY                        | K/uL | 6.15 ± 1.7  | 6.21 ± 1.2  | 8.53 ± 1.7  | 0.9 - 9.3        |
| MO                        | K/uL | 0.41 ± 0.10 | 0.25 ± 0.10 | 0.32 ± 0.12 | 0.0 - 0.4        |
| EO                        | K/uL | 0.54 ± 0.05 | 0.10 ± 0.04 | 0.08 ± 0.02 | 0.0 - 0.2        |
| BA                        | K/uL | 0.14 ± 0.02 | 0.03 ± 0.01 | 0.03 ± 0.01 | 0.0 - 0.2        |
| NE                        | %    | 22.9 ± 5.3  | 29.6 ± 4.1  | 22.8 ± 3.2  | 6.6 - 38.9       |
| LY                        | %    | 66.4 ± 7.0  | 66.4 ± 3.9  | 73.6 ± 8.1  | 55.8 - 91.6      |
| MO                        | %    | 4.7 ± 0.9   | 2.8 ± 1.2   | 2.6 ± 0.3   | 0.0 - 7.5        |
| EO                        | %    | 0.47 ± 0.04 | 0.95 ± 0.13 | 0.71 ± 0.05 | 0.0 - 3.9        |
| BA                        | %    | 1.28 ± 0.02 | 0.29 ± 0.01 | 0.25 ± 0.01 | 0.0 - 2.0        |
| RBC                       | M/uL | 10.1 ± 1.6  | 14.1 ± 0.9  | 10.2 ± 1.9  | 6.36 - 9.42      |
| Hb                        | g/dL | 14.3 ± 2.4  | 9.76 ± 0.7  | 14.6 ± 2.3  | 11.0 - 15.1      |
| HCT                       | %    | 44.9 ± 8.0  | 42.6 ± 4.1  | 44.1 ± 7.9  | 35.1 - 45.4      |
| MCV                       | fL   | 44.3 ± 2.1  | 43.6 ± 1.4  | 43.1 ± 0.7  | 45.4 - 60.3      |
| MCH                       | pg   | 14.3 ± 0.8  | 14.4 ± 0.1  | 14.4 ± 0.5  | 14.1 - 19.3      |
| MCHC                      | g/dL | 32.3 ± 2.8  | 33.1 ± 1.1  | 33.3 ± 1.7  | 30.2 - 34.2      |
| RDW                       | %    | 19.1 ± 0.7  | 18.1 ± 0.7  | 17.9 ± 0.8  | 12.4 - 27.0      |
| PLT                       | K/uL | 355 ± 115   | 788 ± 90    | 629 ± 142   | 592 - 2972       |
| MPV                       | fL   | 5.93 ± 0.3  | 5.50 ± 0.2  | 5.90 ± 0.1  | 5.0 - 20.0       |

**Supplementary Table. 1.**

Hematological parameters analyzed for mice treated with either low dose or high dose acNPs for with a single injection. There is no significant change across all the hematological parameters for either low dose or high dose acNPs (n = 4 animals per condition). Data are expressed as means ± SD.

| Multiple injections of acNPs |      |             |             |             |                  |
|------------------------------|------|-------------|-------------|-------------|------------------|
| Parameter                    |      | HFD Control | HFD and LD  | HFD and HD  | Reference values |
| WBC                          | K/uL | 12.3 ± 1.0  | 9.78 ± 2.3  | 8.35 ± 2.0  | 1.8 - 10.7       |
| NE                           | K/uL | 1.95 ± 0.5  | 3.05 ± 0.8  | 2.79 ± 1.1  | 0.1 - 2.4        |
| LY                           | K/uL | 9.26 ± 2.7  | 6.15 ± 2.1  | 5.35 ± 2.0  | 0.9 - 9.3        |
| MO                           | K/uL | 0.72 ± 0.08 | 0.36 ± 0.10 | 0.11 ± 0.05 | 0.0 - 0.4        |
| EO                           | K/uL | 0.26 ± 0.05 | 0.16 ± 0.03 | 0.08 ± 0.01 | 0.0 - 0.2        |
| BA                           | K/uL | 0.11 ± 0.02 | 0.07 ± 0.01 | 0.01 ± 0.0  | 0.0 - 0.2        |
| NE                           | %    | 15.9 ± 2.3  | 32.6 ± 4.5  | 36.6 ± 6.2  | 6.6 - 38.9       |
| LY                           | %    | 75.3 ± 5.9  | 61.7 ± 4.6  | 60.9 ± 5.5  | 55.8 - 91.6      |
| MO                           | %    | 5.8 ± 1.2   | 3.6 ± 1.3   | 1.4 ± 0.2   | 0.0 - 7.5        |
| EO                           | %    | 2.1 ± 0.2   | 1.5 ± 0.3   | 0.95 ± 0.06 | 0.0 - 3.9        |
| BA                           | %    | 0.87 ± 0.05 | 0.69 ± 0.03 | 0.16 ± 0.01 | 0.0 - 2.0        |
| RBC                          | M/uL | 7.78 ± 1.3  | 9.15 ± 1.2  | 9.51 ± 0.8  | 6.36 - 9.42      |
| Hb                           | g/dL | 14.4 ± 0.4  | 14.1 ± 0.8  | 12.9 ± 1.1  | 11.0 - 15.1      |
| HCT                          | %    | 46.6 ± 4.9  | 42.8 ± 5.5  | 40.7 ± 3.4  | 35.1 - 45.4      |
| MCV                          | fL   | 59.9 ± 5.0  | 47.5 ± 8.0  | 42.8 ± 0.5  | 45.4 - 60.3      |
| MCH                          | pg   | 18.5 ± 1.8  | 15.6 ± 1.7  | 13.6 ± 0.1  | 14.1 - 19.3      |
| MCHC                         | g/dL | 30.9 ± 2.5  | 33.2 ± 3.5  | 31.7 ± 0.6  | 30.2 - 34.2      |
| RDW                          | %    | 30.0 ± 4.1  | 22.2 ± 4.2  | 19.8 ± 0.8  | 12.4 - 27.0      |
| PLT                          | K/uL | 2125 ± 290  | 1033 ± 160  | 947 ± 107   | 592 - 2972       |
| MPV                          | fL   | 5.8 ± 0.9   | 6.16 ± 0.8  | 5.88 ± 0.4  | 5.0 - 20.0       |

**Supplementary Table. 2.**

Hematological parameters analyzed for mice treated with either low dose or high dose acNPs for multiple injections (three injections) over a period of six days. There is no significant change across all the hematological parameters for either low dose or high dose acNPs (n = 4 animals per condition). Data are expressed as means ± SD.

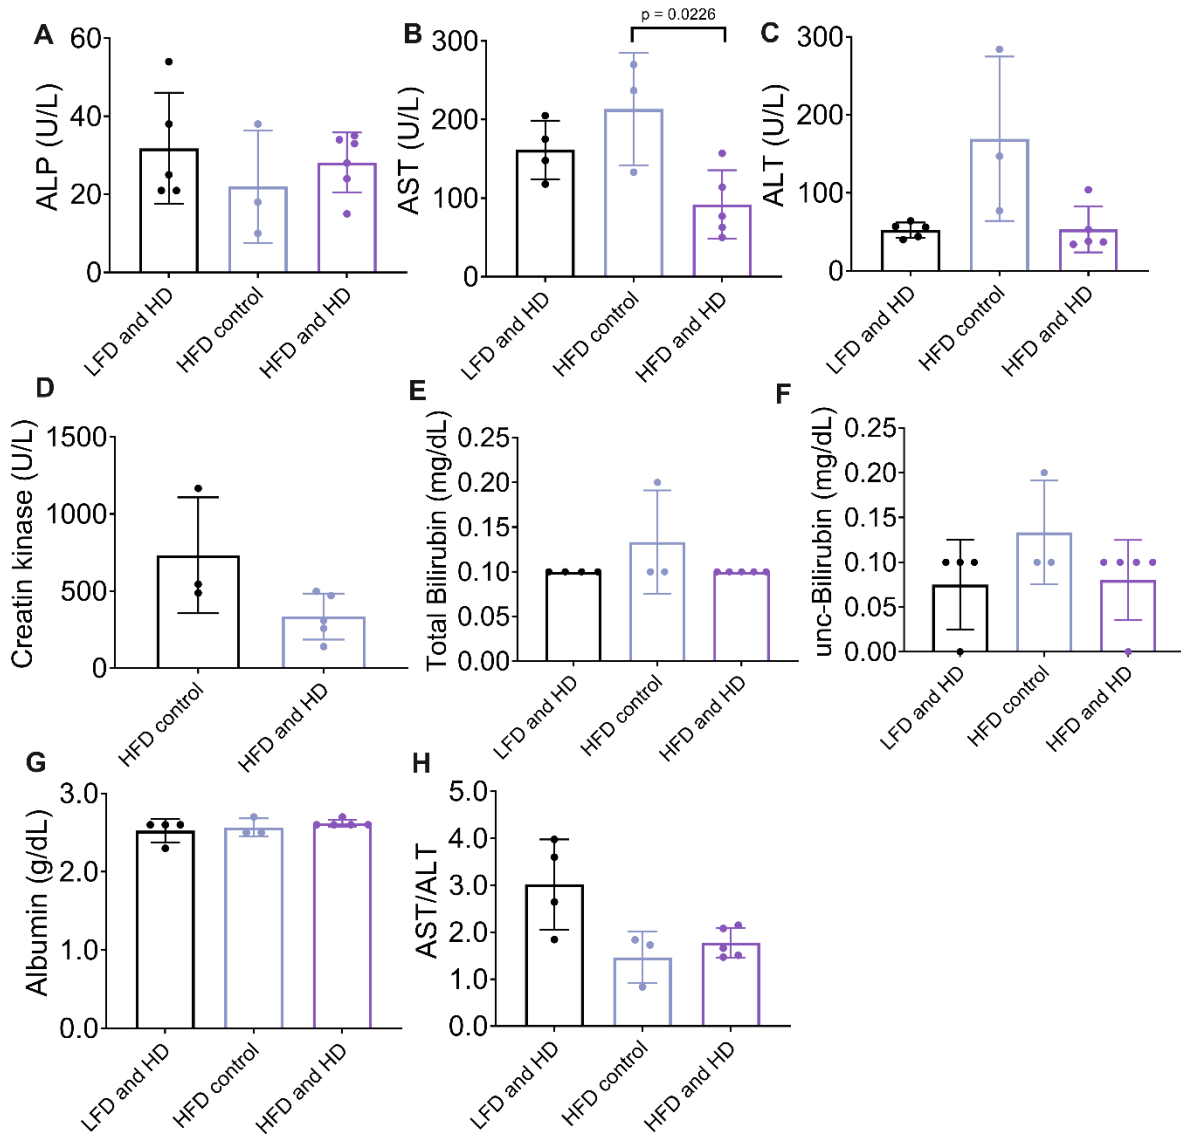

### Supplementary Figure. 5.

Serum indicators in C57BL/6N mice treated with acNPs. Serum (A) Alkaline Phosphatase (ALP), (B) Aspartate transaminase (AST). (C) Alanine transaminase (ALT) (For A – C, n=4 animals for LFD and HD group, n=3 animals for HFD control group, n=6 animals for HFD and HD group). (D) Creatine kinase (n=3 animals for HFD control, n=5 animals for HFD and HD), (E) total bilirubin, (F) unconjugated bilirubin, (G) Albumin, and (H) AST/ALT ratio were analyzed. (For E – H, n=4 animals for LFD and HD, n=3 animals for HFD control, n=5 animals for HFD and HD). acNPs treatment reduced ALP, AST, ALT, creatine kinase, total bilirubin, unconjugated bilirubin levels, indicating improvement in liver function. Two-tailed unpaired t test (B); data are expressed as means  $\pm$  SD. Source data are provided as a Source Data file.

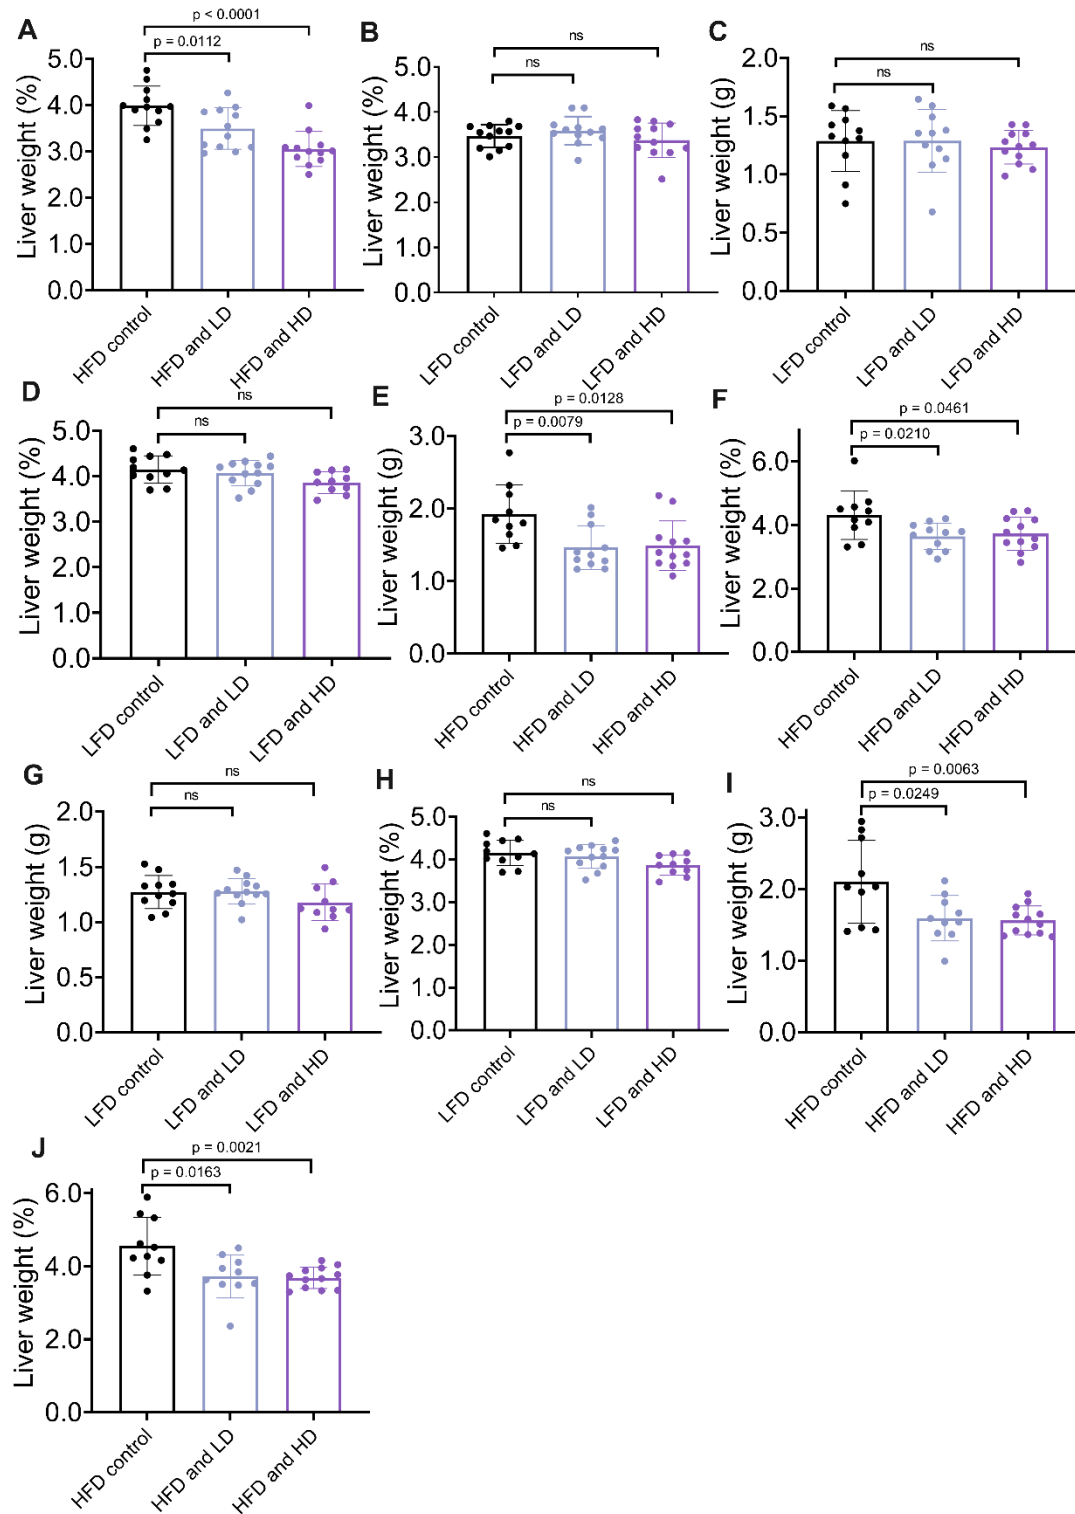

**Supplementary Figure. 6.**

**Liver weight of C57BL/6J DIO mice after multiple doses of acNPs, ipGTT and ipITT.** (A) Multiple injections of acNPs to mice result in significant liver weight/body weight reduction, with more significant reductions with high dose acNPs (n=12 animals per condition). (B) Multiple

injections of acNPs to LFD mice do not result in significant liver weight/body weight reduction (n=12 animals per condition). (C – D) Liver weight of LFD mice did not change after ipGTT (For C, n=11 for LFD control, n=11 for LFD and LD, n=12 for LFD and HD; For D, n=11 animals for LFD control, n=12 animals for LFD and LD, n=10 animals for LFD and HD). (E – F) Liver weight of HFD mice maintained the same amount of reduction with acNPs treatment after ipGTT (For E, n=10 animals for HFD control, n=11 animals for HFD and LD, n=12 animals for HFD and HD; For F, n=10 animals for LFD control, n=11 animals for LFD and LD, n=12 animals for LFD and HD). (G – H) Liver weight of LFD mice did not change after ipITT (For G, n=11 animals for LFD control, n=12 animals for LFD and LD, n=10 animals for LFD and HD; For H, n=10 animals for LFD control, n=10 animals for LFD and LD, n=12 animals for LFD and HD). (I – J) Liver weight of HFD mice maintained the same amount of reduction with acNPs treatment after ipITT. For I, (n=10 animals for HFD control, n=10 animals for HFD and LD, n=12 animals for HFD and HD). For J, (n=10 animals for HFD control, n=10 animals for HFD and LD, n=12 animals for HFD and HD). Two-tailed unpaired t test (A – J); data are expressed as means  $\pm$  SD. n.s. not statistically significant. Source data are provided as a Source Data file.

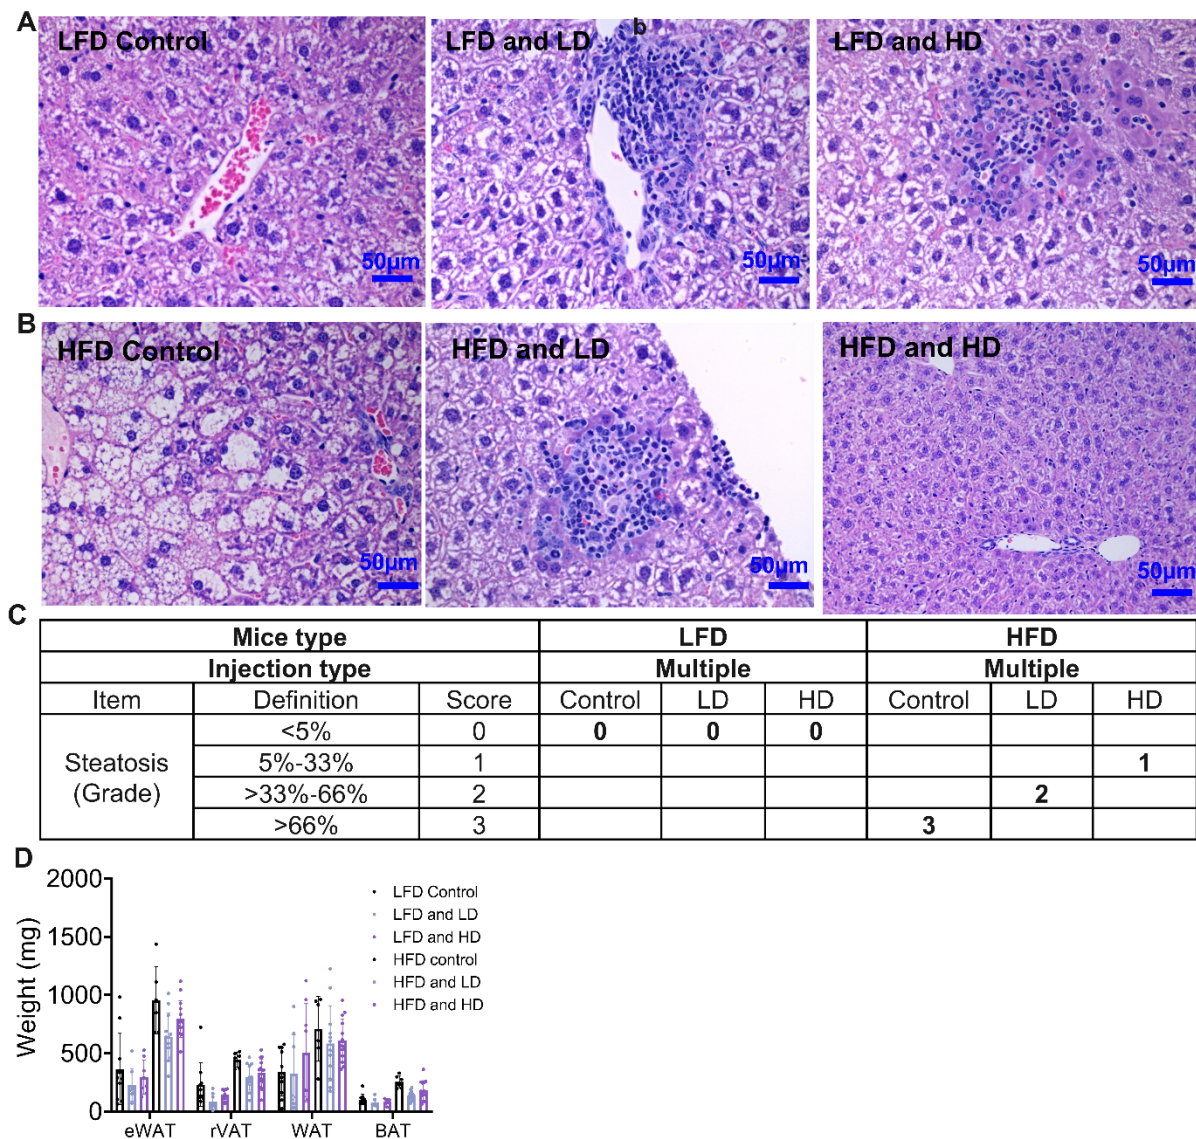

**Supplementary Figure. 7.**

**H & E liver sections of C57BL/6J DIO mice after multiple doses of acNPs, ipGTT and ipITT.**

(A – B) Representative H & E stains of LFD and HFD mice liver slices after ipGTT show maintained reduction in steatosis in livers with acNPs treatment.  $n=3$  animals per treatment condition. (C) Scoring shows lower steatosis for HFD mice. (D) Mice fat pads weight measurements in mice shows that the weight reduction is localized in the liver. ( $n=10$  animals for LFD control,  $n=8$  animals for LFD and LD,  $n=8$  animals for LFD and HD,  $n=6$  animals for HFD control,  $n=12$  animals for HFD and LD,  $n=14$  animals for HFD and HD). Data are expressed as means  $\pm$  SD. Source data are provided as a Source Data file.

| Item                                 | Definition                                                              | Score | Day 1   |    |    | Day 6   |    |    |
|--------------------------------------|-------------------------------------------------------------------------|-------|---------|----|----|---------|----|----|
|                                      |                                                                         |       | Control | LD | HD | Control | LD | HD |
| Steatosis                            |                                                                         |       |         |    |    |         |    |    |
| Grade                                | Low- to medium-power evaluation of parenchymal involvement by steatosis |       |         |    |    |         |    |    |
|                                      | <5%                                                                     | 0     |         |    |    |         | 0  | 0  |
|                                      | 5%-33%                                                                  | 1     |         | 1  |    |         |    |    |
|                                      | >33%-66%                                                                | 2     | 2       |    | 2  | 3       |    |    |
|                                      | >66%                                                                    | 3     |         |    |    |         |    |    |
| Location                             | Predominant distribution pattern                                        |       |         |    |    |         |    |    |
|                                      | Zone 3                                                                  | 0     | 0       | 0  | 0  | 0       | 0  | 0  |
|                                      | Zone 1                                                                  | 1     |         |    |    |         |    |    |
|                                      | Azonal                                                                  | 2     |         |    |    |         |    |    |
|                                      | Panacinar                                                               | 3     |         |    |    |         |    |    |
| Microvesicular steatosis             | Not present                                                             | 0     |         |    |    | 0       |    | 0  |
|                                      | Present                                                                 | 1     | 1       | 1  | 1  |         | 1  |    |
| Fibrosis Stage                       | None                                                                    | 0     | 0       | 0  | 0  | 0       | 0  | 0  |
|                                      | Perisinusoidal or periportal                                            | 1     |         |    |    |         |    |    |
|                                      | Mild, zone 3, perisinusoidal                                            | 1A    |         |    |    |         |    |    |
|                                      | Moderate, zone 3, perisinusoidal                                        | 1B    |         |    |    |         |    |    |
|                                      | Portal/periportal                                                       | 1C    |         |    |    |         |    |    |
|                                      | Perisinusoidal and portal/periportal                                    | 2     |         |    |    |         |    |    |
|                                      | Bridging fibrosis                                                       | 3     |         |    |    |         |    |    |
|                                      | Cirrhosis                                                               | 4     |         |    |    |         |    |    |
| Inflammation<br>Lobular inflammation | No foci                                                                 | 0     | 0       | 0  | 0  | 0       | 0  |    |
|                                      | <2 foci per 200× field                                                  | 1     |         |    |    |         |    | 1  |
|                                      | 2-4 foci per 200× field                                                 | 2     |         |    |    |         |    |    |
|                                      | >4 foci per 200× field                                                  | 3     |         |    |    |         |    |    |
| Microgranulomas                      | Absent                                                                  | 0     | 0       | 0  | 0  | 0       | 0  | 0  |
|                                      | Present                                                                 | 1     |         |    |    |         |    |    |
| Large lipogranulomas                 | Absent                                                                  | 0     | 0       | 0  | 0  | 0       | 0  | 0  |
|                                      | Present                                                                 | 1     |         |    |    |         |    |    |
| Portal inflammation                  | None to minimal                                                         | 0     | 0       | 0  | 0  | 0       | 0  | 0  |
|                                      | Greater than minimal                                                    | 1     |         |    |    |         |    |    |
| Liver cell injury<br>Ballooning      | None                                                                    | 0     | 0       | 0  | 0  | 0       | 0  | 0  |
|                                      | Few balloon cells                                                       | 1     |         |    |    |         |    |    |
|                                      | Many cells/prominent ballooning                                         | 2     |         |    |    |         |    |    |
| Acidophil bodies                     | None to rare                                                            | 0     | 0       | 0  | 0  | 0       | 0  | 0  |
|                                      | Many                                                                    | 1     |         |    |    |         |    |    |
| Pigmented macrophages                | None to rare                                                            | 0     | 0       | 0  | 0  | 0       | 0  | 0  |
|                                      | Many                                                                    | 1     |         |    |    |         |    |    |
| Megamitochondria                     | None to rare                                                            | 0     | 0       | 0  | 0  | 0       | 0  | 0  |
|                                      | Many                                                                    | 1     |         |    |    |         |    |    |
| Mallory's hyaline                    | None to rare                                                            | 0     | 0       | 0  | 0  | 0       | 0  | 0  |
|                                      | Many                                                                    | 1     |         |    |    |         |    |    |
| Glycogenated nuclei                  | None to rare                                                            | 0     | 0       | 0  | 0  | 0       | 0  | 0  |
|                                      | Many                                                                    | 1     |         |    |    |         |    |    |
| Diagnostic classification            | Not steatohepatitis                                                     | 0     | 0       | 0  | 0  | 0       | 0  | 0  |
|                                      | Possible/borderline                                                     | 1     |         |    |    |         |    |    |
|                                      | Definite steatohepatitis                                                | 2     |         |    |    |         |    |    |

**Supplementary Table 3.**

Histopathological scoring grid for NAFLD/NASH liver sections.

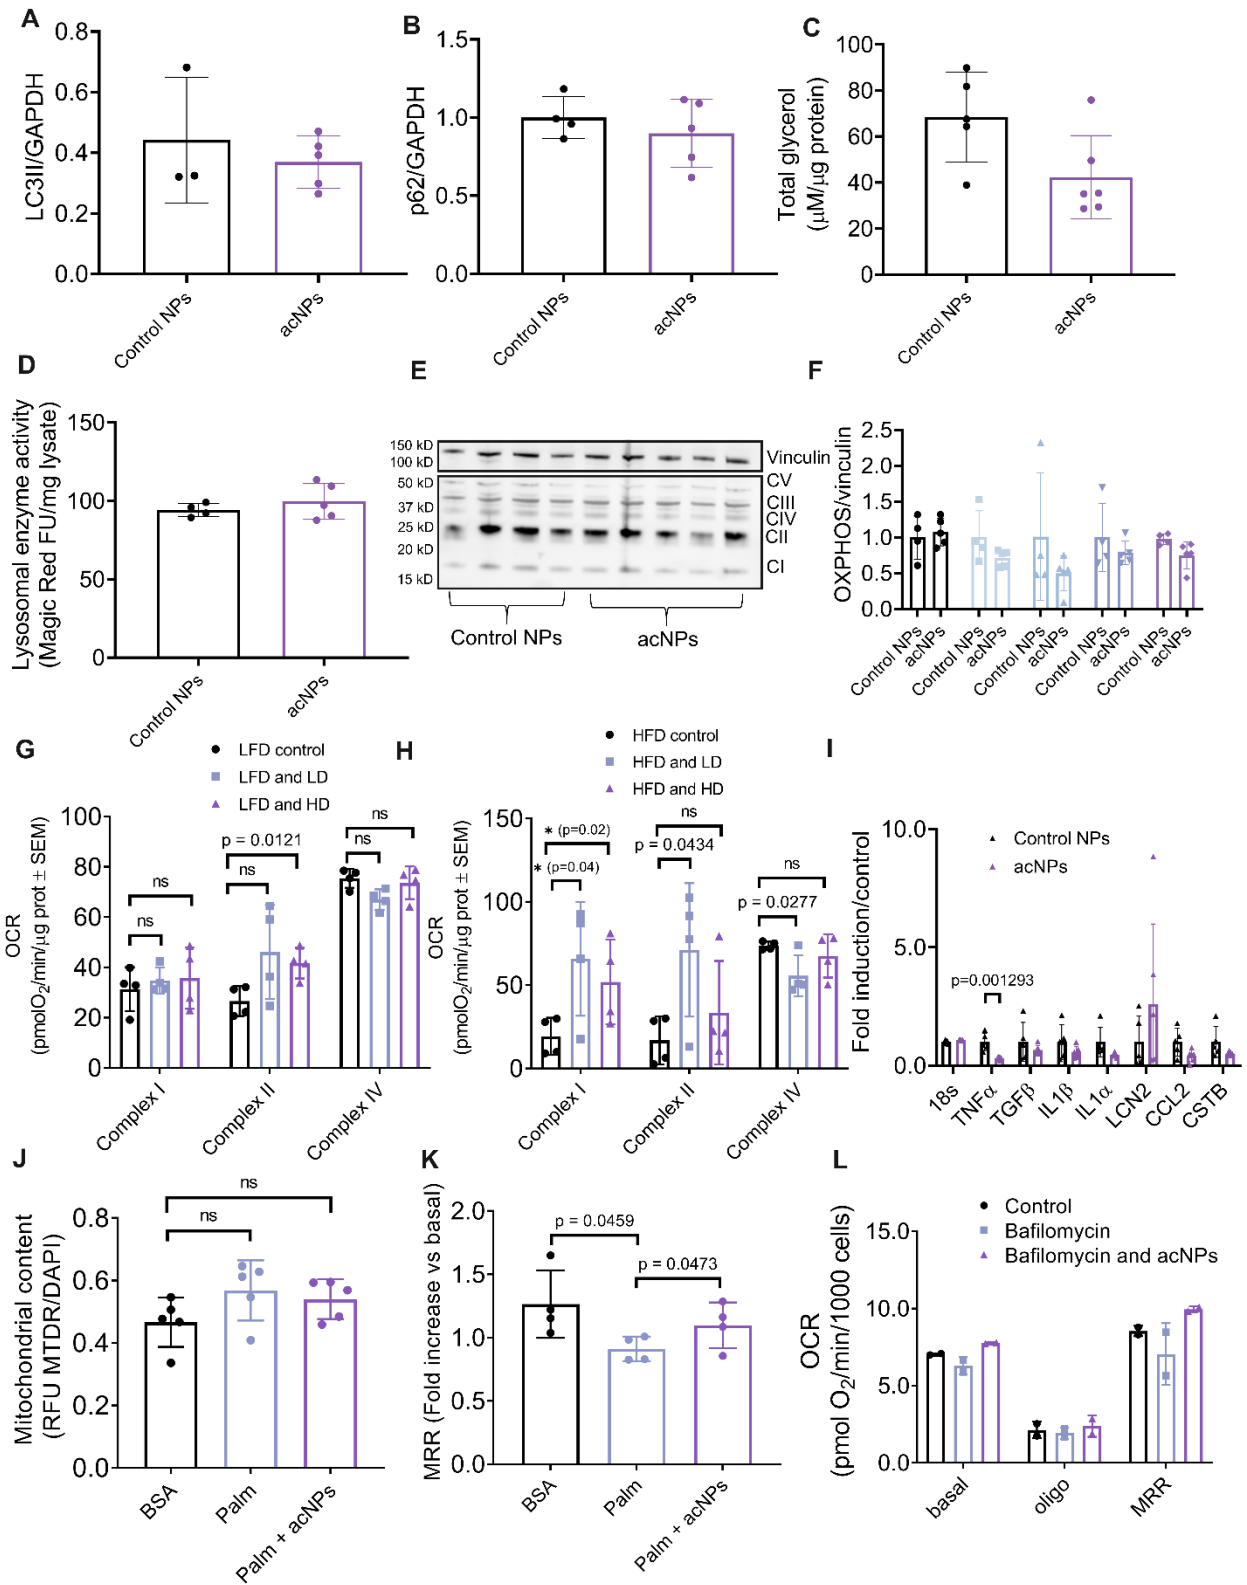

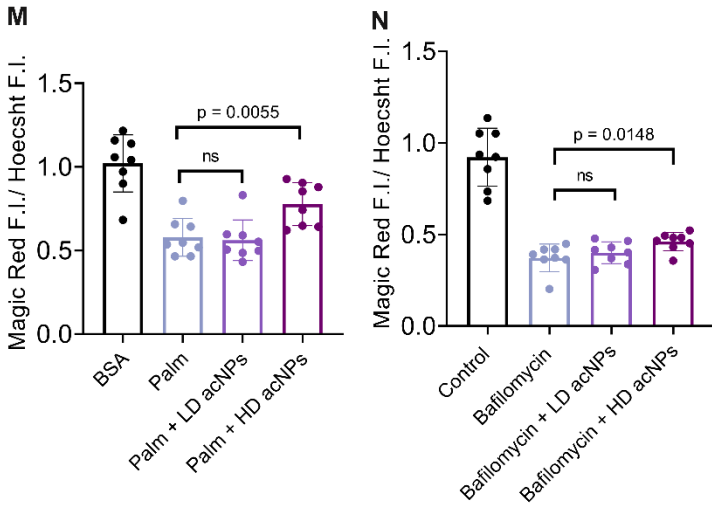

### Supplementary Figure. 8.

Liver autophagy function, mitochondria oxidative capacity, lysosomal enzyme activity, as well as liver inflammatory cytokines RNA expression levels in either C57BL/6N mice or C57BL/6J mice. Replication of the acNPs treatment study was done in C57BL/6N mice. (A – B) Quantification of LC3-II and p62 expression data in C57BL/6N mice (n=3 animals for control NPs, n=5 animals for acNPs). (C) acNPs reduce triglyceride levels in C57BL/6N mice livers compared to control NPs (n=5 animals for control NPs, n=6 animals for acNPs). (D) acNPs increase lysosomal enzyme activity compared to control NPs in C57BL/6N mice (n=4 animals for control NPs, n=5 animals for acNPs). (E – F) Western blot and quantification of mitochondrial complex I-V content. acNPs treatment do not significantly change mitochondrial content (n=4 animals for control NPs, n=5 animals for acNPs). (G) Mitochondrial oxygen consumption rate of C57BL/6J frozen mice liver lysates with LFD control, LFD and LD acNPs and LFD and HD acNPs treatment conditions (n=4 animals per treatment group). (H) Mitochondrial oxygen consumption rate of C57BL/6J frozen mice liver lysates with HFD control, HFD and LD acNPs and HFD and HD acNPs treatment conditions (n=4 animals per treatment group). (I) Liver inflammatory cytokines RNA expression levels. acNPs treatment reduce most cytokine levels, with TNF- $\alpha$  being most significant (n=5 animals for control NPs, n=6 animals for acNPs). (J) Mitochondria content (n=5 animals per treatment condition) and (K) Maximal respiratory rate of different treatment conditions on primary human hepatocytes. (n=4 animals per treatment condition). (L) Mitochondrial oxygen consumption rate of primary human hepatocytes under different treatment conditions (N=2 independent experiments). (M – N) Magic red activity of LD and HD acNPs treated primary human hepatocytes, n=8 animals per treatment condition. Oligo: Oligomycin, MRR: Maximal respiratory rate. Two-tailed unpaired t test (G, H, I, J, K, M, N); data are expressed as means  $\pm$  SD. n.s. not statistically significant. Source data are provided as a Source Data file.

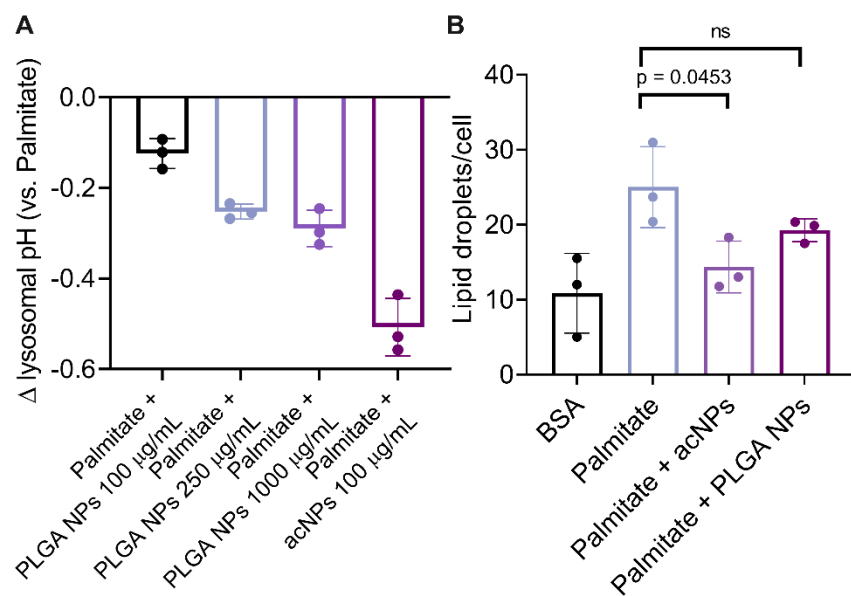

### Supplementary Figure. 9.

Comparison between acNPs and PLGA NPs in HepG2 cells. (A) Quantification of lysosomal pH in palmitate treated HepG2 cells with either acNPs or PLGA NPs (N=3 independent experiments). (B) Quantification of HepG2 lipid droplets with either acNPs or PLGA NPs using Nile red staining (N=3 independent experiments). Two-tailed unpaired t test (B); data are expressed as means  $\pm$  SD. n.s. not statistically significant. Source data are provided as a Source Data file.

Known equilibrium and Ka values:

$$K_{1,TFSA} = \frac{[H^+][M_1^-]}{[M_1H]} = 2.51 * 10^{-2} \quad (1)$$

$$K_{2,SA} = \frac{[H^+][M_2^-]}{[M_2H]} = 6.31 * 10^{-5} \quad (2)$$

Upon addition of NPs to solution, we assume that all generated acid in solution is due to polymer degradation

$$[H^+] = [H^+]_{pH\ 7, t=0h} + [M_1^-] + [M_2^-] \quad (3)$$

$$[M_2^-] = [H^+] - [H^+]_{pH\ 7, t=0h} - [M_1^-] \quad (4)$$

$$[M_1^-] = [H^+] - [H^+]_{pH\ 7, t=0h} - [M_2^-] \quad (5)$$

We assume the acids can be either protonated or unprotonated in solution and that the acids in solution are equivalent to the monomer ratios within the polymer:

$$[TFSA] = [M_1H] + [M_1^-] \quad [SA] = [M_2H] + [M_2^-] \quad (6)$$

$$[TFSA] = 0.25[Total] \quad [SA] = 0.75[Total] \quad (7)$$

$$[Total] = [TFSA] + [SA] \quad (8)$$

We then use the two separate equations defining the total amount of monomer, [Total], in solution equal to one another, substitute, and solve for  $[M_1^-]$

$$[Total] = 4[TFSA] = 4([M_1H] + [M_1^-]) = 4\left(\frac{[H^+][M_1^-]}{k_1} + [M_1^-]\right) \quad (9)$$

$$[Total] = [M_1H] + [M_1^-] + [M_2H] + [M_2^-] = \frac{[H^+][M_1^-]}{k_1} + [M_1^-] + \frac{[H^+]( [H^+] - [H^+]_{pH\ 7} - [M_1^-] )}{k_2} + [H^+] - [H^+]_{pH\ 7} \quad (10)$$

$$[M_1^-] = \frac{\frac{[H^+]^2}{k_2} - \frac{[H^+][H^+]_{pH\ 7}}{k_2} + [H^+] - [H^+]_{pH\ 7}}{\frac{3[H^+]}{k_1} + 4 + \frac{[H^+]}{k_2}} \quad (11)$$

**Supplementary Note.** Calculation of the amount of tetrafluorosuccinic acid (TFSA) or succinic acid (SA) required to generate the pH changes as measured in pH 6.0 buffer.

## Additional materials and methods

| TNF- $\alpha$  |                                |        |                |          |  |
|----------------|--------------------------------|--------|----------------|----------|--|
| PrimerBank ID  | 133892368c3                    |        |                |          |  |
| Amplicon Size  | 148                            |        |                |          |  |
|                | Sequence (5' $\rightarrow$ 3') | Length | T <sub>m</sub> | Location |  |
| Forward Primer | CCTGTAGCCCACGTCGTAG            | 19     | 61.5           | 271-289  |  |
| Reverse Primer | GGGAGTAGACAAGGTACAACCC         | 22     | 61.4           | 418-397  |  |
| TGF- $\beta$   |                                |        |                |          |  |
| PrimerBank ID  | 6755774c1                      |        |                |          |  |
| Amplicon Size  | 91                             |        |                |          |  |
|                | Sequence (5' $\rightarrow$ 3') | Length | T <sub>m</sub> | Location |  |
| Forward Primer | CCACCTGCAAGACCATCGAC           | 20     | 62.8           | 92-111   |  |
| Reverse Primer | CTGGCGAGCCTTAGTTTGGAC          | 21     | 63             | 182-162  |  |
| IL-1 $\alpha$  |                                |        |                |          |  |
| PrimerBank ID  | 118130060c1                    |        |                |          |  |
| Amplicon Size  | 109                            |        |                |          |  |
|                | Sequence (5' $\rightarrow$ 3') | Length | T <sub>m</sub> | Location |  |
| Forward Primer | TCTATGATGCAAGCTATGGCTCA        | 23     | 61.3           | 104-126  |  |
| Reverse Primer | CGGCTCTCCTTGAAGGTGA            | 19     | 61             | 212-194  |  |
| IL-1 $\beta$   |                                |        |                |          |  |
| PrimerBank ID  | 118130747c1                    |        |                |          |  |
| Amplicon Size  | 116                            |        |                |          |  |
|                | Sequence (5' $\rightarrow$ 3') | Length | T <sub>m</sub> | Location |  |
| Forward Primer | GAAATGCCACCTTTTGACAGTG         | 22     | 60.2           | 28-49    |  |
| Reverse Primer | TGGATGCTCTCATCAGGACAG          | 21     | 61             | 142-123  |  |
| LCN2           |                                |        |                |          |  |
| PrimerBank ID  | 1019908a1                      |        |                |          |  |
| Amplicon Size  | 239                            |        |                |          |  |
|                | Sequence (5' $\rightarrow$ 3') | Length | T <sub>m</sub> | Location |  |
| Forward Primer | TGGCCCTGAGTGTCATGTG            | 19     | 61.6           | 2-20     |  |
| Reverse Primer | CTCTTGTAGCTCATAGATGGTGC        | 23     | 60.2           | 240-218  |  |
| CCL2           |                                |        |                |          |  |
| PrimerBank ID  | 6755430a1                      |        |                |          |  |
| Amplicon Size  | 121                            |        |                |          |  |
|                | Sequence (5' $\rightarrow$ 3') | Length | T <sub>m</sub> | Location |  |
| Forward Primer | TTAAAAACCTGGATCGGAACCAA        | 23     | 60.1           | 260-282  |  |
| Reverse Primer | GCATTAGCTTCAGATTTACGGGGT       | 23     | 60.7           | 380-358  |  |
| CSTB           |                                |        |                |          |  |
| PrimerBank ID  | 6681071a1                      |        |                |          |  |
| Amplicon Size  | 196                            |        |                |          |  |
|                | Sequence (5' $\rightarrow$ 3') | Length | T <sub>m</sub> | Location |  |
| Forward Primer | AGGTGAAGTCCCAGCTTGAAT          | 21     | 61.1           | 65-85    |  |
| Reverse Primer | GTCTGATAGGAAGACAGGGTCA         | 22     | 60.3           | 260-239  |  |
| 18S rRNA       |                                |        |                |          |  |
| PrimerBank ID  | 6755368a1                      |        |                |          |  |
| Amplicon Size  | 166                            |        |                |          |  |
|                | Sequence (5' $\rightarrow$ 3') | Length | T <sub>m</sub> | Location |  |
| Forward Primer | AGTTCCAGCACATTTTGCGAG          | 21     | 61.4           | 23-43    |  |
| Reverse Primer | TCATCCTCCGTGAGTTCTCCA          | 21     | 62.1           | 188-168  |  |
